# Supplementary material
Source: publisher figshare collection journal article supplement (https://future-science-group.figshare.com/ndownloader/files/30909439)
Supplement: Supplementary file 1 [file 30909439]

**Table S3. The P value of correlation between ferroptosis and four scores in 33 cancer types**

| Cancer Type | StromalScore | ImmuneScore | ESTIMATEScore | TumorPurity |
| --- | --- | --- | --- | --- |
| ACC | 1.75E-07 | 3.09E-08 | 3.48E-09 | 3.48E-09 |
| BLCA | 1.61E-13 | <2.2E-16 | <2.2E-16 | <2.2E-16 |
| BRCA | <2.2E-16 | <2.2E-16 | <2.2E-16 | <2.2E-16 |
| CESC | 3.02E-06 | 0.000272243 | 1.92E-06 | 1.92E-06 |
| CHOL | 0.074875691 | 0.088385939 | 0.054342322 | 0.054342322 |
| COAD | 4.56E-11 | 1.10E-12 | 2.95E-13 | 2.95E-13 |
| DLBC | 0.003403465 | <2.2E-16 | 1.73E-08 | 1.73E-08 |
| ESCA | 0.000307643 | 2.37E-05 | 1.30E-05 | 1.30E-05 |
| GBM | <2.2E-16 | <2.2E-16 | <2.2E-16 | <2.2E-16 |
| HNSC | <2.2E-16 | 4.78E-13 | <2.2E-16 | <2.2E-16 |
| KICH | 1.55E-05 | 0.004525294 | 0.000336058 | 0.000336058 |
| KIRC | <2.2E-16 | 6.35E-10 | 1.82E-16 | 1.82E-16 |
| KIRP | <2.2E-16 | 2.08E-11 | <2.2E-16 | <2.2E-16 |
| LAML | 1.10E-10 | 9.50E-08 | 7.36E-10 | 7.36E-10 |
| LGG | <2.2E-16 | <2.2E-16 | <2.2E-16 | <2.2E-16 |
| LIHC | 1.77E-14 | 9.47E-09 | 2.44E-12 | 2.44E-12 |
| LUAD | 1.33E-09 | 8.23E-16 | 2.06E-14 | 2.06E-14 |
| LUSC | <2.2E-16 | <2.2E-16 | <2.2E-16 | <2.2E-16 |
| MESO | 0.141089511 | 0.000558191 | 0.004311681 | 0.004311681 |
| OV | 8.91E-14 | <2.2E-16 | <2.2E-16 | <2.2E-16 |
| PAAD | <2.2E-16 | <2.2E-16 | <2.2E-16 | <2.2E-16 |
| PCPG | <2.2E-16 | <2.2E-16 | <2.2E-16 | <2.2E-16 |
| PRAD | <2.2E-16 | <2.2E-16 | <2.2E-16 | <2.2E-16 |
| READ | 6.89E-05 | 0.008631318 | 0.000387961 | 0.000387961 |
| SARC | <2.2E-16 | <2.2E-16 | <2.2E-16 | <2.2E-16 |
| SKCM | <2.2E-16 | <2.2E-16 | <2.2E-16 | <2.2E-16 |
| STAD | 7.11E-06 | 1.30E-10 | 5.15E-09 | 5.15E-09 |
| TGCT | <2.2E-16 | 0.027985813 | 1.98E-06 | 1.98E-06 |
| THCA | 2.28E-09 | 7.43E-14 | 1.84E-13 | 1.84E-13 |
| THYM | 7.42E-07 | 0.216630747 | 0.000659657 | 0.000659657 |
| UCEC | 0.236130952 | 0.001310026 | 0.012980694 | 0.012980694 |
| UCS | 0.023810784 | 0.000233015 | 0.000405213 | 0.000405213 |
| UVM | 7.71E-07 | 8.15E-05 | 5.34E-06 | 5.34E-06 |
